# Supplementary material for: Are Signals Regulating Energy Homeostasis Related to Neuropsychological and Clinical Features of Gambling Disorder? A Case–Control Study
Source: MDPI journal article supplement (doi:10.3390/nu14235084), 2022-11-29
Supplement: s1 [file s1]

**Table S1.** Characteristics of the sample.

|                 |            | Control (N = 41) |       | GD (N = 297) |       |          |                              |     |                 |       | GD (N = 297) |  |
|-----------------|------------|------------------|-------|--------------|-------|----------|------------------------------|-----|-----------------|-------|--------------|--|
|                 |            | n                | %     | n            | %     | p        |                              |     | Mean            | SD    |              |  |
| Sex             | Women      | 4                | 9.8%  | 19           | 6.4%  | 0.423    | Age of onset of GD           |     | 29.10           | 12.42 |              |  |
|                 | Men        | 37               | 90.2% | 278          | 93.6% |          | Duration of GD               |     | 5.23            | 6.02  |              |  |
| Education       | Primary    | 7                | 17.1% | 157          | 52.9% | <0.001 * | Number DSM-5 criteria for GD |     | 7.13            | 1.80  |              |  |
|                 | Secondary  | 15               | 36.6% | 112          | 37.7% |          |                              |     | n               | %     |              |  |
| Marital         | University | 19               | 46.3% | 28           | 9.4%  | 0.014 *  | Debts due to GD              |     | No              | 122   | 41.1%        |  |
|                 | Single     | 17               | 41.5% | 158          | 53.2% |          |                              |     | Yes             | 175   | 58.9%        |  |
|                 | Married    | 23               | 56.1% | 103          | 34.7% |          | Gambling                     |     | Non-stratetigic | 148   | 49.8%        |  |
|                 | Divorced   | 1                | 2.4%  | 36           | 12.1% |          |                              |     | Strategic       | 92    | 31.0%        |  |
| Social index    | High       | 0                | 0.0%  | 8            | 2.7%  | 0.005 *  |                              |     | Mixed           | 57    | 19.2%        |  |
|                 | Mean-high  | 2                | 4.9%  | 19           | 6.4%  |          | Substances use               |     | n               | %     |              |  |
|                 | Mean       | 3                | 7.3%  | 24           | 8.1%  |          | Tobacco                      | Yes | 138             | 46.5% |              |  |
|                 | Mean-low   | 28               | 68.3% | 113          | 38.0% |          | Alcohol                      | Yes | 43              | 14.5% |              |  |
|                 | Low        | 8                | 19.5% | 133          | 44.8% |          | Other drugs                  | Yes | 34              | 11.4% |              |  |
|                 |            | Mean             | SD    | Mean         | SD    | p        |                              |     |                 |       |              |  |
| Age (years-old) |            | 49.27            | 15.23 | 39.58        | 14.16 | <0.001 * |                              |     |                 |       |              |  |
| BMI (kg/m²)     |            | 24.79            | 1.98  | 26.48        | 5.04  | 0.035 *  |                              |     |                 |       |              |  |

Note. GD: gambling disorder. BMI: body mass index. SD: standard deviation. DSM-5: Diagnostic and Statistical Manual of Mental Disorders, Fifth Edition. \* Bold: significant comparison.

Table S2. Partial correlation matrix.

|                                       | Control (N = 41)           |                            |                            |                            | Gambling disorder (N = 297) |        |        |        |
|---------------------------------------|----------------------------|----------------------------|----------------------------|----------------------------|-----------------------------|--------|--------|--------|
|                                       | Ghrelin                    | LEAP2                      | Leptin                     | Adeno.                     | Ghrelin                     | LEAP2  | Leptin | Adeno. |
| <sup>1</sup> Psychopathology: SCL-90R |                            |                            |                            |                            |                             |        |        |        |
| Somatization                          | -0.088                     | 0.220                      | 0.128                      | -0.101                     | 0.064                       | 0.092  | 0.042  | 0.018  |
| Obsessive/compulsive                  | 0.119                      | 0.047                      | -0.143                     | -0.079                     | 0.043                       | 0.141  | 0.084  | 0.046  |
| Interpersonal sensitivity             | 0.173                      | <b>0.266</b> <sup>†</sup>  | 0.043                      | -0.009                     | 0.050                       | 0.026  | -0.028 | 0.028  |
| Depressive                            | 0.135                      | 0.134                      | -0.116                     | 0.048                      | 0.073                       | 0.056  | 0.040  | -0.037 |
| Anxiety                               | 0.061                      | <b>0.271</b> <sup>†</sup>  | 0.032                      | 0.073                      | 0.018                       | 0.122  | 0.046  | -0.019 |
| Hostility                             | -0.065                     | 0.058                      | 0.020                      | 0.064                      | 0.070                       | 0.055  | -0.013 | -0.006 |
| Phobic anxiety                        | 0.126                      | <b>0.317</b> <sup>†</sup>  | <b>0.237</b> <sup>†</sup>  | -0.119                     | 0.023                       | 0.057  | 0.119  | 0.082  |
| Paranoid Ideation                     | 0.199                      | <b>0.304</b> <sup>†</sup>  | 0.097                      | -0.030                     | 0.011                       | 0.104  | -0.021 | 0.021  |
| Psychotic                             | 0.168                      | 0.192                      | 0.063                      | 0.079                      | 0.028                       | 0.074  | 0.023  | 0.004  |
| GSI score                             | 0.093                      | 0.226                      | -0.016                     | 0.001                      | 0.054                       | 0.092  | 0.033  | 0.010  |
| PST score                             | 0.151                      | 0.179                      | -0.031                     | -0.069                     | 0.042                       | 0.063  | 0.018  | 0.004  |
| PSDI score                            | -0.075                     | <b>0.370</b> <sup>†</sup>  | 0.093                      | 0.155                      | 0.057                       | 0.080  | 0.016  | -0.013 |
| <sup>1</sup> Impulsivity: UPPS-P      |                            |                            |                            |                            |                             |        |        |        |
| Lack premeditation                    | 0.012                      | -0.064                     | 0.089                      | <b>-0.290</b> <sup>†</sup> | 0.040                       | -0.018 | -0.028 | 0.024  |
| Lack perseverance                     | 0.029                      | -0.184                     | -0.098                     | -0.150                     | 0.009                       | 0.013  | 0.033  | 0.066  |
| Sensation seeking                     | -0.079                     | -0.234                     | -0.123                     | -0.004                     | -0.013                      | -0.009 | -0.101 | 0.058  |
| Positive urgency                      | -0.055                     | -0.120                     | 0.006                      | -0.183                     | 0.028                       | 0.096  | -0.074 | 0.004  |
| Negative urgency                      | -0.091                     | 0.132                      | 0.126                      | -0.159                     | 0.050                       | 0.073  | -0.055 | 0.019  |
| Total                                 | -0.068                     | -0.146                     | -0.010                     | -0.207                     | 0.027                       | 0.053  | -0.076 | 0.050  |
| <sup>1</sup> Gambling severity        |                            |                            |                            |                            |                             |        |        |        |
| DSM-5 criteria                        | -0.073                     | 0.141                      | 0.073                      | -0.126                     | 0.029                       | 0.013  | 0.081  | -0.041 |
| <sup>2</sup> Neuropsychological data  |                            |                            |                            |                            |                             |        |        |        |
| IGT: block 1                          | 0.150                      | 0.070                      | 0.003                      | -0.002                     | 0.009                       | 0.091  | -0.037 | 0.054  |
| IGT: block 2                          | 0.005                      | 0.141                      | -0.058                     | 0.095                      | -0.013                      | -0.002 | -0.052 | 0.034  |
| IGT: block 3                          | 0.020                      | 0.008                      | <b>-0.263</b> <sup>†</sup> | -0.075                     | 0.020                       | 0.062  | 0.011  | 0.047  |
| IGT: block 4                          | 0.005                      | 0.075                      | <b>-0.345</b> <sup>†</sup> | -0.005                     | -0.025                      | 0.043  | -0.081 | 0.017  |
| IGT: block 5                          | <b>-0.258</b> <sup>†</sup> | -0.096                     | -0.224                     | -0.071                     | -0.181                      | 0.039  | 0.029  | -0.107 |
| IGT: total                            | -0.044                     | 0.034                      | <b>-0.280</b> <sup>†</sup> | -0.035                     | -0.074                      | 0.071  | -0.033 | 0.001  |
| IGT: learning                         | -0.191                     | -0.077                     | <b>-0.331</b> <sup>†</sup> | -0.076                     | -0.124                      | 0.014  | 0.009  | -0.090 |
| IGT: risk                             | -0.130                     | -0.003                     | <b>-0.330</b> <sup>†</sup> | -0.040                     | -0.127                      | 0.048  | -0.026 | -0.057 |
| WCST: trials                          | <b>-0.317</b> <sup>†</sup> | 0.127                      | -0.006                     | 0.008                      | 0.005                       | -0.063 | 0.042  | -0.054 |
| WCST: errors                          | -0.215                     | 0.164                      | 0.100                      | 0.025                      | 0.002                       | -0.065 | -0.023 | -0.090 |
| WCST: errors perseverant              | <b>-0.253</b> <sup>†</sup> | 0.189                      | 0.089                      | 0.028                      | 0.025                       | -0.066 | -0.011 | -0.100 |
| WCST: conceptual                      | -0.154                     | -0.082                     | <b>-0.272</b> <sup>†</sup> | -0.109                     | -0.002                      | 0.036  | 0.077  | 0.060  |
| WCST: categories completed            | 0.164                      | -0.053                     | -0.126                     | 0.002                      | -0.038                      | 0.019  | 0.054  | 0.040  |
| WCST: trials complete 1-cat.          | 0.005                      | 0.065                      | -0.124                     | 0.061                      | 0.046                       | -0.014 | -0.023 | -0.091 |
| TMT: A                                | -0.103                     | <b>0.385</b> <sup>†</sup>  | -0.062                     | 0.061                      | -0.008                      | 0.047  | -0.030 | 0.025  |
| TMT: B                                | -0.133                     | <b>0.368</b> <sup>†</sup>  | <b>0.295</b> <sup>†</sup>  | 0.034                      | -0.066                      | 0.036  | -0.036 | 0.108  |
| TMT: Diff                             | -0.118                     | <b>0.282</b> <sup>†</sup>  | <b>0.389</b> <sup>†</sup>  | 0.015                      | -0.066                      | 0.029  | -0.032 | 0.110  |
| Stroop: words                         | 0.082                      | -0.195                     | 0.110                      | 0.103                      | -0.066                      | -0.027 | 0.053  | -0.075 |
| Stroop: colors                        | -0.050                     | -0.160                     | -0.035                     | -0.099                     | -0.031                      | -0.085 | 0.004  | -0.085 |
| Stroop: words-colors                  | -0.052                     | <b>-0.340</b> <sup>†</sup> | 0.067                      | 0.024                      | -0.027                      | -0.032 | -0.023 | -0.008 |
| Stroop: estimated                     | -0.008                     | -0.192                     | 0.033                      | -0.032                     | -0.050                      | -0.068 | 0.027  | -0.091 |
| Stroop: interference                  | -0.065                     | <b>-0.316</b> <sup>†</sup> | 0.066                      | 0.057                      | 0.000                       | 0.006  | -0.050 | 0.055  |
| WMS-III: direct                       | 0.041                      | <b>-0.271</b> <sup>†</sup> | -0.232                     | <b>-0.289</b> <sup>†</sup> | -0.026                      | -0.134 | 0.021  | -0.040 |
| WMS-III: direct-span                  | 0.026                      | -0.151                     | -0.103                     | -0.190                     | -0.036                      | -0.128 | 0.009  | -0.067 |
| WMS-III: inverse                      | 0.028                      | -0.061                     | -0.111                     | -0.207                     | -0.075                      | -0.064 | 0.041  | 0.002  |
| WMS-III: inverse-span                 | 0.052                      | -0.172                     | -0.060                     | -0.195                     | -0.063                      | -0.070 | 0.049  | 0.031  |
| WMS-III: total                        | 0.040                      | -0.195                     | -0.200                     | <b>-0.289</b> <sup>†</sup> | -0.056                      | -0.110 | 0.035  | -0.021 |
| WAIS: vocabulary                      | -0.237                     | -0.003                     | 0.008                      | 0.046                      | 0.050                       | -0.014 | 0.012  | 0.054  |

Note. <sup>1</sup> Partial correlation adjusted by sex, age, and BMI. <sup>2</sup> Partial correlation adjusted by sex, age, BMI and education level. LEAP2: liver enriched antimicrobial peptide 2. SCL-90R: Symptom Checklist-90-Revised. GSI: Global Severity Index. PST: Positive Symptom Total. PSDI: Positive Symptom Distress Index. UPPS-P: Impulsive Behavior Scale. IGT: Iowa Gambling Test. WCST: Wisconsin Card Sorting Test. TMT: Trail Making Test. WMS-III: Wechsler Memory Scale Third Edition. WAIS: Wechsler Adult Intelligence Scale. <sup>†</sup> Bold: effect size into the range mild-moderate ( $|R| > 0.24$ ) to high-large ( $|R| > 0.37$ ).
